# Supplementary material
Source: PubMed Central journal article supplement (PMC7667978)
Supplement: supp_RA120.015164_162048_2_supp_591235_qg14hj.pdf [file supp_RA120.015164_162048_2_supp_591235_qg14hj.pdf]

## SUPPLEMENTARY TABLES

**Supplemental Table 1. Yeast genotypes used in this study.**

| <b><u>Strain Number</u></b>  | <b><u>Genotype</u></b>                                                                                                                                                                             |
|------------------------------|----------------------------------------------------------------------------------------------------------------------------------------------------------------------------------------------------|
| MBY623-638 and 662-669       | <i>MAT<math>\alpha</math> can1<math>\Delta</math>::STE2pr-Sp_his5 lyp1<math>\Delta</math> his3<math>\Delta</math>1 leu2<math>\Delta</math>0 met15<math>\Delta</math>0 ura3<math>\Delta</math>0</i> |
| MBY703-706, 713-714, and 799 | <i>MAT<math>\alpha</math> can1<math>\Delta</math>::STE2pr-Sp_his5 lyp1<math>\Delta</math> his3<math>\Delta</math>1 leu2<math>\Delta</math>0 ura3<math>\Delta</math>0 met15<math>\Delta</math>0</i> |
| MBY710, 711, and 715         | <i>MAT<math>\alpha</math> leu2-3,112 trp1-1 can1-100 ura3-1 ade2-1 his3-11,15</i>                                                                                                                  |

**Supplemental Table 2. List of yeast strains used in this study.**

| <b><u>Number</u></b> | <b><u>Name</u></b>               | <b><u>Description</u></b>                          |
|----------------------|----------------------------------|----------------------------------------------------|
| MBY623               | <i>ura3::NatMX pESC-URA</i>      | Empty vector control in a wild-type background     |
| MBY624               | <i>rpd3::NatMX pESC-URA</i>      | Empty vector control in an <i>rpd3Δ</i> background |
| MBY625               | <i>hda1::NatMX pESC-URA</i>      | Empty vector control in an <i>hda1Δ</i> background |
| MBY626               | <i>hda2::NatMX pESC-URA</i>      | Empty vector control in an <i>hda2Δ</i> background |
| MBY627               | <i>hda3::NatMX pESC-URA</i>      | Empty vector control in an <i>hda3Δ</i> background |
| MBY628               | <i>hos1::NatMX pESC-URA</i>      | Empty vector control in a <i>hos1Δ</i> background  |
| MBY629               | <i>hos2::NatMX pESC-URA</i>      | Empty vector control in a <i>hos2Δ</i> background  |
| MBY630               | <i>hos3::NatMX pESC-URA</i>      | Empty vector control in a <i>hos3Δ</i> background  |
| MBY631               | <i>ura3::NatMX pESC-URA-PIF1</i> | Pif1 overexpression in a wild-type background      |
| MBY632               | <i>rpd3::NatMX pESC-URA-PIF1</i> | Pif1 overexpression in an <i>rpd3Δ</i> background  |
| MBY633               | <i>hda1::NatMX pESC-URA-PIF1</i> | Pif1 overexpression in an <i>hda1Δ</i> background  |
| MBY634               | <i>hda2::NatMX pESC-URA-PIF1</i> | Pif1 overexpression in an <i>hda2Δ</i> background  |
| MBY635               | <i>hda3::NatMX pESC-URA-PIF1</i> | Pif1 overexpression in an <i>hda3Δ</i> background  |
| MBY636               | <i>hos1::NatMX pESC-URA-PIF1</i> | Pif1 overexpression in a <i>hos1Δ</i> background   |
| MBY637               | <i>hos2::NatMX pESC-URA-PIF1</i> | Pif1 overexpression in a <i>hos2Δ</i> background   |

|        |                                             |                                                       |
|--------|---------------------------------------------|-------------------------------------------------------|
| MBY638 | <i>hos3::NatMX pESC-URA-PIF1</i>            | Pif1 overexpression in a <i>hos3Δ</i> background      |
| MBY662 | <i>ura3::NatMX pESC-URA-PIF1ΔN</i>          | Pif1ΔN overexpression in a <i>rpd3Δ</i> background    |
| MBY663 | <i>rpd3::NatMX pESC-URA-PIF1ΔN</i>          | Pif1ΔN overexpression in an <i>hda1Δ</i> background   |
| MBY664 | <i>hda1::NatMX pESC-URA-PIF1ΔN</i>          | Pif1ΔN overexpression in an <i>hda2Δ</i> background   |
| MBY665 | <i>hda2::NatMX pESC-URA-PIF1ΔN</i>          | Pif1ΔN overexpression in an <i>hda3Δ</i> background   |
| MBY666 | <i>hda3::NatMX pESC-URA-PIF1ΔN</i>          | Pif1ΔN overexpression in a <i>hos1Δ</i> background    |
| MBY667 | <i>hos1::NatMX pESC-URA-PIF1ΔN</i>          | Pif1ΔN overexpression in a <i>hos2Δ</i> background    |
| MBY668 | <i>hos2::NatMX pESC-URA-PIF1ΔN</i>          | Pif1ΔN overexpression in a <i>hos3Δ</i> background    |
| MBY669 | <i>hos3::NatMX pESC-URA-PIF1ΔN</i>          | Pif1ΔN overexpression in a <i>rpd3Δ</i> background    |
| MBY693 | <i>esa1-414 pESC-URA</i>                    | Empty vector control in an <i>esa1-414</i> background |
| MBY694 | <i>esa1-414 pESC-URA-PIF1</i>               | Pif1 overexpression in an <i>esa1-414</i> background  |
| MBY703 | <i>gcn5Δ::KanMX pESC-URA empty vector</i>   | Empty vector control in a <i>gcn5Δ</i> background     |
| MBY704 | <i>gcn5Δ::KanMX pESC-URA-PIF1</i>           | Pif1 overexpression in a <i>gcn5Δ</i> background      |
| MBY705 | <i>rtt109Δ::KanMX pESC-URA empty vector</i> | Empty vector control in an <i>rtt109Δ</i> background  |
| MBY706 | <i>rtt109Δ::KanMX pESC-URA-PIF1</i>         | Pif1 overexpression in an <i>rtt109Δ</i> background   |
| MBY710 | <i>WT MBY580 pESC-URA empty vector</i>      | Empty vector control in a wild-type background        |
| MBY711 | <i>WT MBY580 pESC-URA-PIF1</i>              | Pif1 overexpression in a wild-type background         |

|        |                                       |                                                        |
|--------|---------------------------------------|--------------------------------------------------------|
| MBY713 | <i>gcn5Δ::KanMX pESC-URA-PIF1ΔN</i>   | Pif1ΔN overexpression in a <i>gcn5Δ</i> background     |
| MBY714 | <i>rtt109Δ::KanMX pESC-URA-PIF1ΔN</i> | Pif1ΔN overexpression in an <i>rtt109Δ</i> background  |
| MBY715 | <i>WT MBY580 pESC-URA-PIF1ΔN</i>      | Pif1ΔN overexpression in a wild-type background        |
| MBY799 | <i>esa1-414 pESC-URA-PIF1ΔN</i>       | Pif1ΔN overexpression in an <i>esa1-414</i> background |

**Supplemental Table 3. Plasmids used in this study.**

| <b>Number</b> | <b>Name</b>              | <b>Description</b>                                                                                                        |
|---------------|--------------------------|---------------------------------------------------------------------------------------------------------------------------|
| pMB524        | pESC-URA                 | Multi-copy vector enabling epitope tagging of genes cloned under the control of the bidirectional <i>GALI,10</i> promoter |
| pMB526        | pESC-URA-Pif1            | Pif1 cloned into pESC-URA, enabling galactose induction and C-terminal FLAG tagging                                       |
| pMB540        | pESC-URA-Pif1 $\Delta$ N | Pif1 $\Delta$ N cloned into pESC-URA, enabling galactose induction and C-terminal FLAG tagging                            |
| pMB472        | pSUMO-Pif1               | Nuclear isoform of Pif1 cloned into the pSUMO vector for over-expression in <i>Escherichia coli</i>                       |
| pMB562        | pSUMO-Pif1 $\Delta$ N    | Pif1 $\Delta$ N cloned into the pSUMO vector for over-expression in <i>E. coli</i>                                        |
| pST44         | P6XHis-Epl1/Yng2/Esa1    | Wild-type Esa1, Yng2 (2-18), and 6X His-Epl1 (51-380) cloned into the pST44 vector for over-expression in <i>E. coli</i>  |



## SUPPLEMENTARY FIGURES

### Supplementary Figure 1:

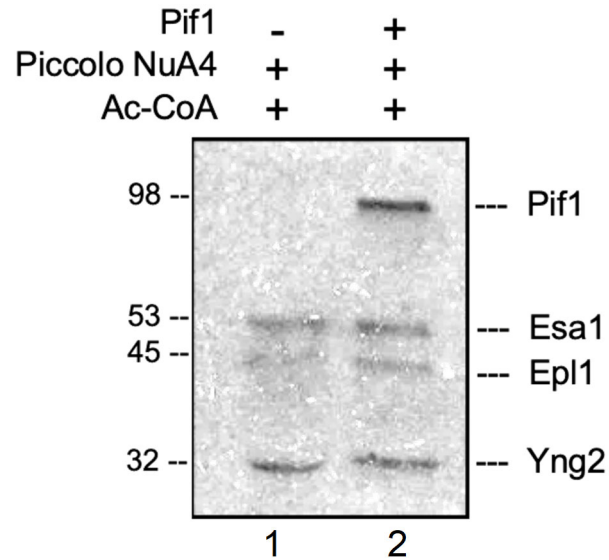

**Piccolo NuA4 (Esa1) *in vitro*-acetylates Pif1:** Recombinant NuA4 and full-length Pif1 were incubated along with  $^{14}\text{C}$  labelled-acetyl CoA as described in the Materials and Methods. The reaction products were separated on a 4-15% SDS-PAGE gel and subsequently subjected to autoradiography. Piccolo NuA4 (Esa1) was capable of robustly acetylating Pif1 *in vitro* (lane 2). The Esa1 subunit also underwent autoacetylation and acetylated the other subunits (Epl1 and Yng2) of the NuA4 complex (lanes 1 and 2).

## Supplementary Figure 2:

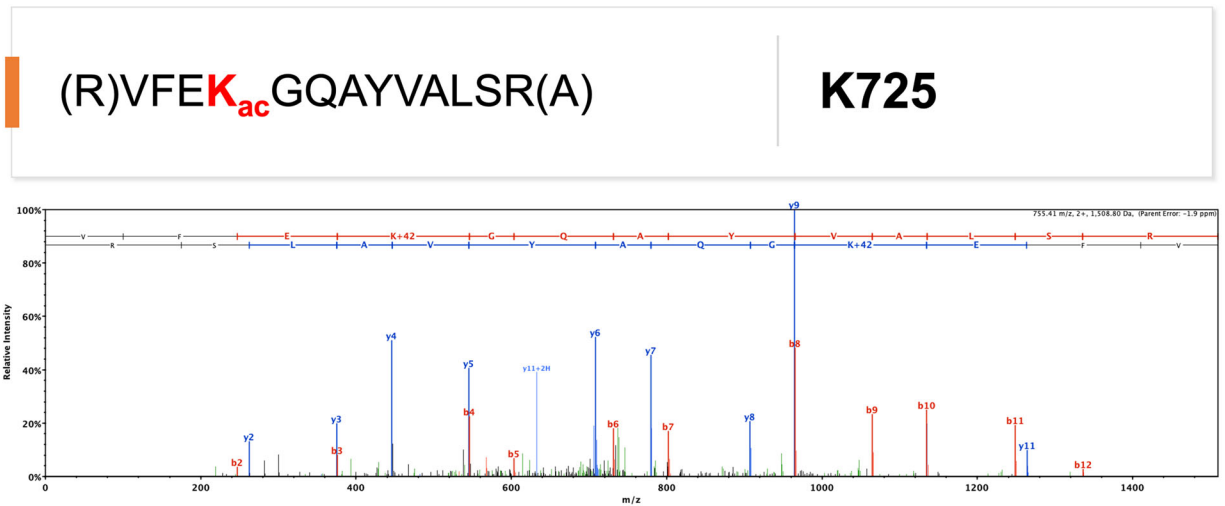

**Spectra for Acetylated Pif1 Lysine 725:** Representative spectra for lysine acetylation sites on Pif1 annotated on Scaffold (Proteome Software, Portland OR). The b-ions are labeled in red, and y-ions are labeled in blue. Neutral loss and other parent ion fragments are shown in green. The sequence of the acetylated peptide is denoted above the spectra with the acetylated lysine (K) highlighted in bold red font.



**Supplementary Figure 3:**

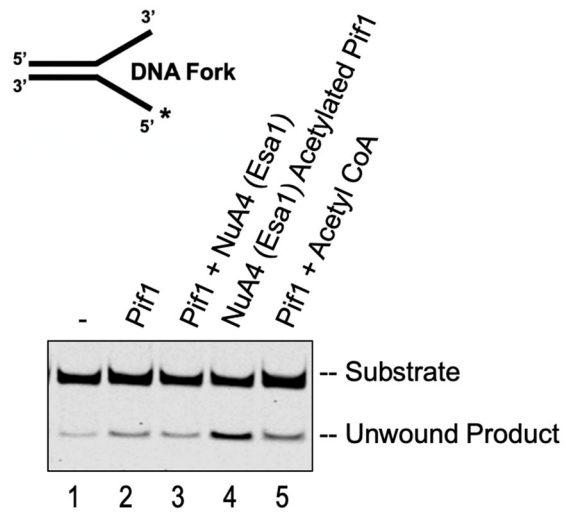

**Stimulation of helicase activity is dependent on Pif1 acetylation alone.** Helicase assays were performed using an IR labeled DNA fork in the presence of one nanomolar of either UM-Pif1 (lane 2), Pif1 + Piccolo NuA4 (Esa1) (lane 3), AC-Pif1 (lane 4) or Pif1 + Acetyl CoA lithium salt as described in Materials and Methods.
